# Supplementary material for: The Wg and Dpp morphogens regulate gene expression by modulating the frequency of transcriptional bursts
Source: eLife. 2020 Jun 22;9:e56076. doi: 10.7554/eLife.56076 (PMC7340504; doi:10.7554/eLife.56076)
Supplement: Supplementary file 1. — Each worksheet lists the oligos specific for a gene, as indicated. Sequences are ordered 5' - to - 3'. [file elife-56076-supp1.xlsx]

## Sheet: GFP
gattctggatctttactttt
cgtgatccttgtaatccatt
tcgtggtccttgtagtcgcc
gtcatcgtccttgtaatcaa
ggaagtacaagttttccttg
tgggggtgggaccagttgct
catgccgctgcccttctcga
acagctcctcgcccttggac
aggatgggcaccacgccggt
cacgtcgccatccagctcca
gcacgctgaacttgtggccg
gcgtcgccctcgccctcgcc
cagggtcagcttgccgttgg
tgccggtggtgcagatgaac
gtgggccagggcacgggcag
gtaggtcagggtggtcacca
agcggctgaagcactgcacg
tgctgcttcatgtgatcggg
catggcgctcttgaagaaat
gctcctgcacgtagccctcg
tcatccttgaagctgatggt
ggcgcgggtcttgtaggtgc
tatcgccctcgaacttcacc
agctcgatgcggttcaccag
ctccttgaaatcgatgccct
tgtggcccaggatgttgcca
ctgttgaagttgtactccag
ggcggtgatgtacacgttgt
tgatgccgttcttctgctta
tggcggatcttgaagttggc
cacggagccatcctccacat
gctggtagtgatcggccagc
ccgtcgccgatgggggtgtt
gttatcgggcagcagcactg
cgctctgggtgctcaggtag
tcgttggggtccttggacag
cagcaccatgtgatcgcgct
cggcggcggtcacgaactcc
tcatccatgcccagggtgat
gccgctgctctccttgtaca
ctgggcagcagttcaggaag
tgccgcccggttccatgcag
ctccgcttcaccgctacctc
aaggcatccccatggtgatg

## Sheet: Salm
tgcggcactgagagaaatcg
gcgcgtgtttagctaattta
cagtgggaaacgcgtagtac
tcagcttgatcattgcacta
acacagaacgttggacaggt
tatccttgaagtcactacgc
ttttattgatggtctcctgg
ccttcagctgtttgacaatg
aaccattcgcaatggtcttg
tcataggtatctgtttcctg
tttattagatgctgacgcgc
cttcagagattcagctggag
tgtgttatccaaactcggtc
tggttggtgataatgctgga
tttctcaccgaaggcaaagt
tgaagaacggctcattgcga
atcttatgtggatctggagc
aagtgaaccttaaggttgcc
tgaaacttgtccatgtgctc
gggaatgattgggagagcta
tagagattctgaaggccagg
ttaaggatttccataggcgg
tctgatgaaggagagggtgt
gaagaaatcttcgcggggtg
cggtggtaaagttaaggggg
tcgtgcttgatggggttaaa
aggtgttcgaaacctcgatg
atcacagaccacacactgat
cactggtggaagtttctcat
gcattcgagtacttcttgtg
ataaagtgaccgggcatcat
acgacacatcatcgtcgtag
ctcagcttttgctcgaacaa
cgaagagctgcgcttgataa
ctgagaagcctctgaacgag
tcacagatgctgcacttgaa
tacttattcgcgatcttcgt
tcttgatagcggattaagcc
gcgagaatcgattgcatctt
ccccggctagatcataaaaa
gcatctttggatacgtttca
agattccgttctcagttttg
tcggcgatcgcatctaaatt
gcaaagcgtttggatttcga
gtggttcttcatctgtgata
ttaatccttccttccaatga
gtacgatcgctcatagactt
acattggcatccgtgtataa

## Sheet: Omb
ttcaacttgtccgaatcgga
tcgtcctgctgattatcaag
ccaagtgattaaaccaggca
tttccgagcaactcgaatcg
caccgatatattcggtgacg
aaggcaacaaatgcggcgac
gatacaggccatgtggatac
ttgggcattgaagagcagac
caaacaaagccggatgctgg
cttgtaatggtgataccggt
gcgaaaagcgatggctcttt
aaactgccgggcaaactgta
caggagtcactgcatcgaag
ggtgacatcgaaatcggtcg
tggttgcttcatcagggatg
atcttctccatgctcttaag
attgtgttgaacctccagtc
catggtgcgagtgtagatgg
agtaattgtcactgatccgt
ccaactctagttccaattcg
tcgacgtccagatcaagatc
ttcagaggctagaggcaatg
cgctaaaccacaaagacggt
gctacaaatgcctatagtct
tgagttcgcaacgagagagg
aacactggcgataaacgggc
gctaggctttgcttagaaac
gaatcgccagcgatttctag
attagacctctccatcactt
tttttgctaccttctgtctt
ttttcctgttttttgtttcc
agttacgacgattctcttgc
cttgaagtctggaaccttca
ctcattttattccgtctgtt
aatttgtctgaggatagccc
ataaagaggcgccatctttg
tcatccacctaagactaaga
gtgtttacggtatcttggta
gcattttctatcgtctacga
tcagggggttccgaaattaa
cacagaactcttgccctaaa
tgcgaggaacatgcgttgaa
ctttgtcgctctctcttaaa
ttcttgcttttttctcctta
gaagattgtgtggtgttgca
tcataagaatgcctatgcga
ggttgtttgcgtttgtttta
cagtgacatgaggtgttgtt

## Sheet: Omb 5-prime
ggcaaaagcgtttgacgtga
tttggtttatctgacgacgc
cacacgtaaacacggcgaga
tgccttcggattgaagcaaa
ttcttgattccttatcgtcg
agaatctgcagggtgatgtt
tttctttaatcttgtcaggt
cacactttacgcacttttca
ccttgctgttgtttgatttt
tttatattctttggacctcc
aaatctcaggcggaaaccag
ggtcgcattcaaactgcatt
ggcgatgacgacacgaacta
agggaaacggcgatttggat
tagttagctggctgctgtaa
tcacttggcagttttaagtt
tcgtttcttttgctttgcaa
gtgtttaaaccttgttctgt
tgttttggcgacggcaaaac
catgtttcattgcttttcgt
tttctcttcttgttgtttca
ggacactcactgacttgtac
ctctctagtttgacttttga
gcgatctctccaaaaaaggg
gtcatgcagaaagggtttcc
accgtttcaaacaaccaagt
tggacgtcgtatctcatcac
tcctcagcagactgatgaaa
attggcgaacctggcgaatg
gcagaaatggatgatatgcc
ctgaagtcagtgggtcgttg
cgccgtcaacagcgaggaaa
cgctgttgttattgttgcta
agttgttgtttccgctgttg
ttggtgttgttgttggaatt
gttggtgttattggtgtttg
ttggtgaaacggccacgaga
tagaccaacaattgtgggcg
cgtactgggtgagtgatgtg
agatgatgggcgtgcggatg
tgaccttgggatcatcgacg
ttgtggaacttctcccacag
ctcttggtgatgaccatttc

## Sheet: Omb Intronic
ggaacttgggatcggtttta
agggagagagtctgagtttc
caagtgtgagtgtgtctcag
atcttgcactcacttgacac
attgttacgtaagcctttgc
gctgtgcagagcttagaata
ttgaatttggccagctatga
ctttctattggtgttgttgc
ccaagtgcgaacaaccaaca
tattttgttcaccgacttgc
agcatttgccacagaaagga
ttttgcagggtcatgaactc
gtgtgctaggtacaagtact
aaaagggtggcatggtgttt
ttcaagtggcactcacatga
gccaagtgaatgcaaatcca
aaactatagccacaagcctc
acacgtcattctgaaggagc
gaagtaggagcaccgtattg
tgcgcttagacagcaatttc
ggtgtggaaaacgaggggag
ttctcgcactgaaagtgtcg
ccaataaattgccgctttca
ctgtcacaaagtccgacatc
tgaactttgacaggcggttg
catcgataatttttcctgcc
aaggaggtttttgcccaaat
gatatgtgtatctaccgcac
attttccatacgctctacac
aaagtagctaattgcccagt
atatgcgtatctttcgttgc
ccgggatctcggaaatatga
gtggattgtagttttgacca
ttttgctgtctttctttctc
gcgacggaaacgcttactta
catcaattttcggctggttg
cctccaccttaaatgtgata
tgtacatttccatcgtttct
gtcgtaagattgggtctgta
aatattccattccatgcagt
tttgtgcatttccaagttgt
aaggacgtcatcatcgtcat
ttgtcgttatttttctggcg
cgatccgatttttaagcgga
cagcaacagccacgatatta
tgcttttttgagagaggctt
ttcttttagtcttcgcagtt
gaccgttctcattgtttttg

## Sheet: Sens
agacgaacacgtccgtatcg
cggttttatcttgactcact
cttcgatgggtcttattcag
gtgatcttggattcgaacgg
caaatctcactttcttggcg
ttttctcaatactgttcact
ttgctttaacagtctttgga
tcactggatctgatttacgt
ctggatctttactttttgga
cggcgataggtgattcattt
tatcacagtgttgaaggcgg
gcgggttgtacaaaaagggc
agtagggcactcgagtagag
cgtggccgaggacaacaaaa
ctgacccaaaaccacagagg
tcaaggcaaagtcacgatcc
ttcatttggagttcatgctc
cttgctgttctcattgttat
gtgcttagatttagtggcat
gaatcatccgatgtgatgcg
ctgctgtgatactgatctcg
cacttcactgctggaactgc
taacgttcagcgaggtcatc
tttagattcacagcgctcag
ttgctgtggtgtactcgaac
ggtgaccagatgatgttacc
cgatctctcgcacatcgagg
acaataggatccacctggtg
gcgctcatacttgaactttc
gcgaggatatggatgcagtt
agcgaggagatcggcgattg
tcgaactccagatcctggac
atgggcatacaactgctgtt
cgtcaatccggccatgaatg
tgagcagctccagattgttg
ctcttcagcttcaagtgctg
ttgatgcgatgctgttgctg
tgccaccaaattcatgagtg
gtgttgattacgcatgtagc
tgatgcaactgttgttgctg
tgatgctgatgttgctgcgg
cgtcgagtcaggatgttgct
gacgaggaggacgaacgacg
ttcgttttctccttggtaag
gtggatgagcagatctggaa
ccacaatattggcagggata
atgtccgacttttggtggaa
gtatgtatgtacgtgtgctt

## Sheet: Sd
gagctggtgatgtttttcat
aggttgttctgcaattgcag
caacttccaactcgctgcag
caactgcctgttgttctgtc
gtgtccacggtgatggtatg
atttgtgtctgccgatccaa
acatccaggtttttgctatc
tttcgtcatcgctcatatca
gcatcagcggatgacaagtc
cgatatctggactccataca
aaagcctcttgaaagctctg
tgatttttctacgtccgcac
attttaccctcgtcggataa
tgcgattagctcgttgcgac
cctgtgcgcagttttatata
cacttggatgtgcgaactga
tggatctcgcggagtttacg
gccagaattgcactttgatt
aaatcttgggacgtgcttgg
gaagggcttgatgctgtaat
aaaccgcagtcgacgttttg
caattgtgagggcggaattc
gaatttgtgcgtggcaatgg
gaacgccgtaaactcgagta
tttcatctctctggatttcc
gaacgaatagatgccggtga
cggaaaaggatggcttgccg
tcaacagtctcaagcaatgg
acttgtcgaatatttgccgt
ttaagtcccccagatttctc
tggacccttttcgtagagat
cccagcatttaactaggtaa
gttagatcggtattcaggtc
atagaaatcacccgtttcgc
tttcgtattggctggttacg
cacacgagcacgacattctc
tgcttgccaaaggagcaaac
gattgttctccagtcgagag
gcgttgaatgcgatagacgt
gatcatgtactcgcacatgg
gttcttcagcttctgaataa
tcatcatatagcgttccggt
gtaaagttttccagcacact
ggccctcattacttgcaata
atgcacaacagtgtctcctg
cgccacctcaaacacatagg
gacggtatatgtgatgggtg
